# Supplementary material for: Exosomes Derived From Natural Killer Cells Exert Therapeutic Effect in Melanoma
Source: PubMed Central journal article supplement — Theranostics. 2017 Jul 7;7(10):2732–45. doi: 10.7150/thno.18752 (PMC5558565; doi:10.7150/thno.18752), 2017-07-07
Supplement: thnov07p2732s1.pdf [file thnov07p2732s1.pdf]

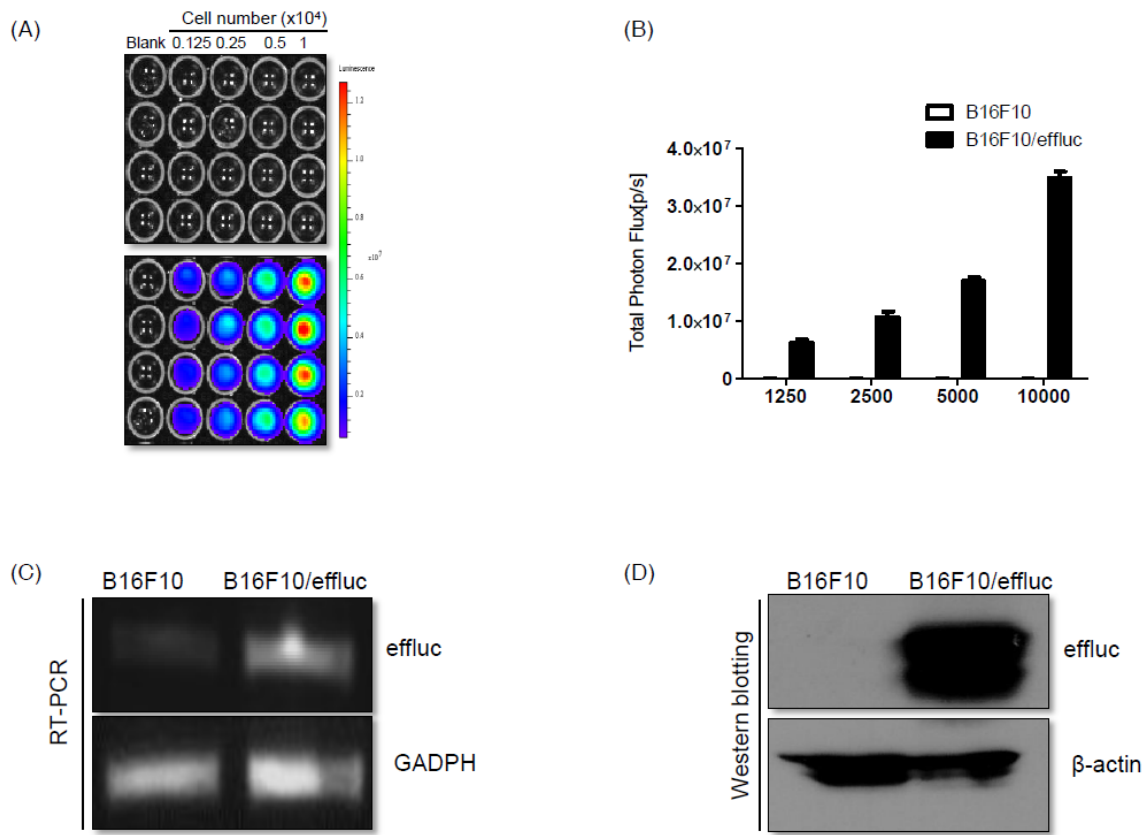

**Supplementary Fig 1. Establishment of a stable reporter gene-expressing melanoma cell line.**

(A) and (B) Firefly luciferase activity was determined by bioluminescence imaging (BLI) and the intensity of the signal increased in a cell number-dependent manner,  $R^2 = 0.90$ . (C) and (D) Reverse transcriptase polymerase chain reaction and western blotting showed enhanced firefly luciferase (effluc) expression at the mRNA and protein levels, respectively, in B16F10/effluc melanoma cells.

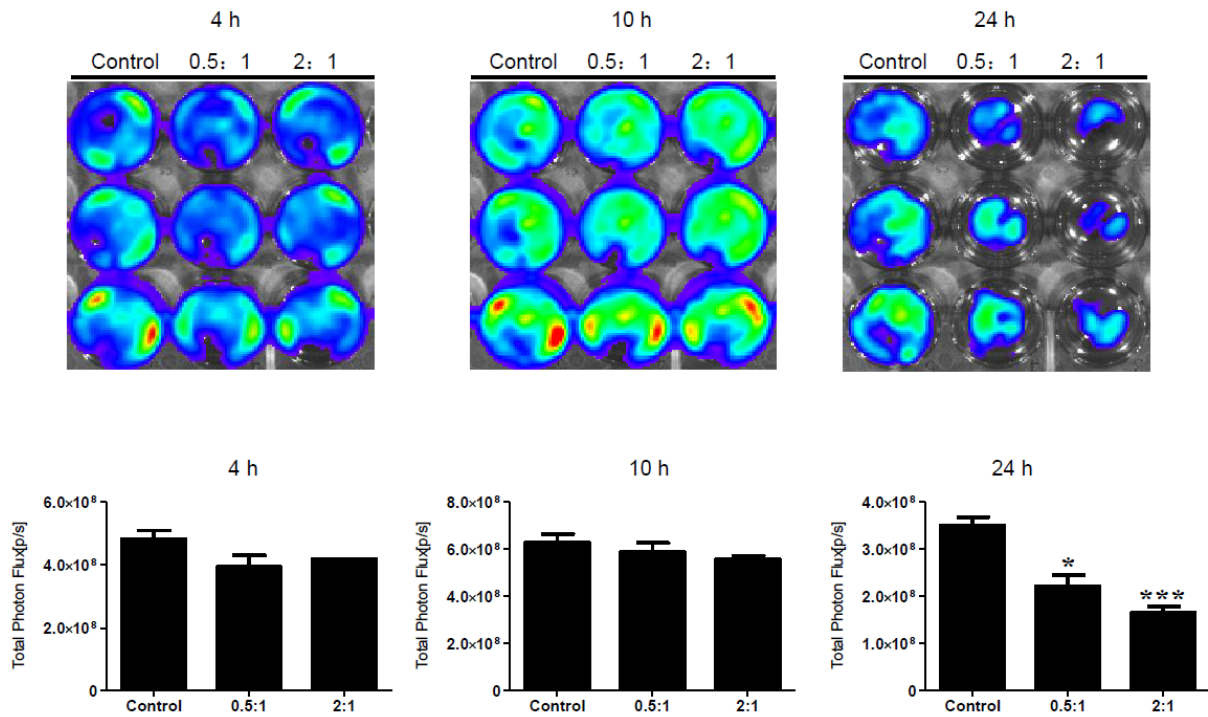

**Supplementary Fig 2. NK cell cytotoxicity against melanoma cells.**

Bioluminescence signals were monitored in the B16F10/effluc cells after co-incubation with NK cells. The signal was decreased by co-incubation in a time- and cell number-dependent manner. Experiments were performed at least in triplicate and mean  $\pm$  SD were plotted. \* $p < 0.05$ , \*\* $p < 0.01$ , \*\*\* $p < 0.001$ .

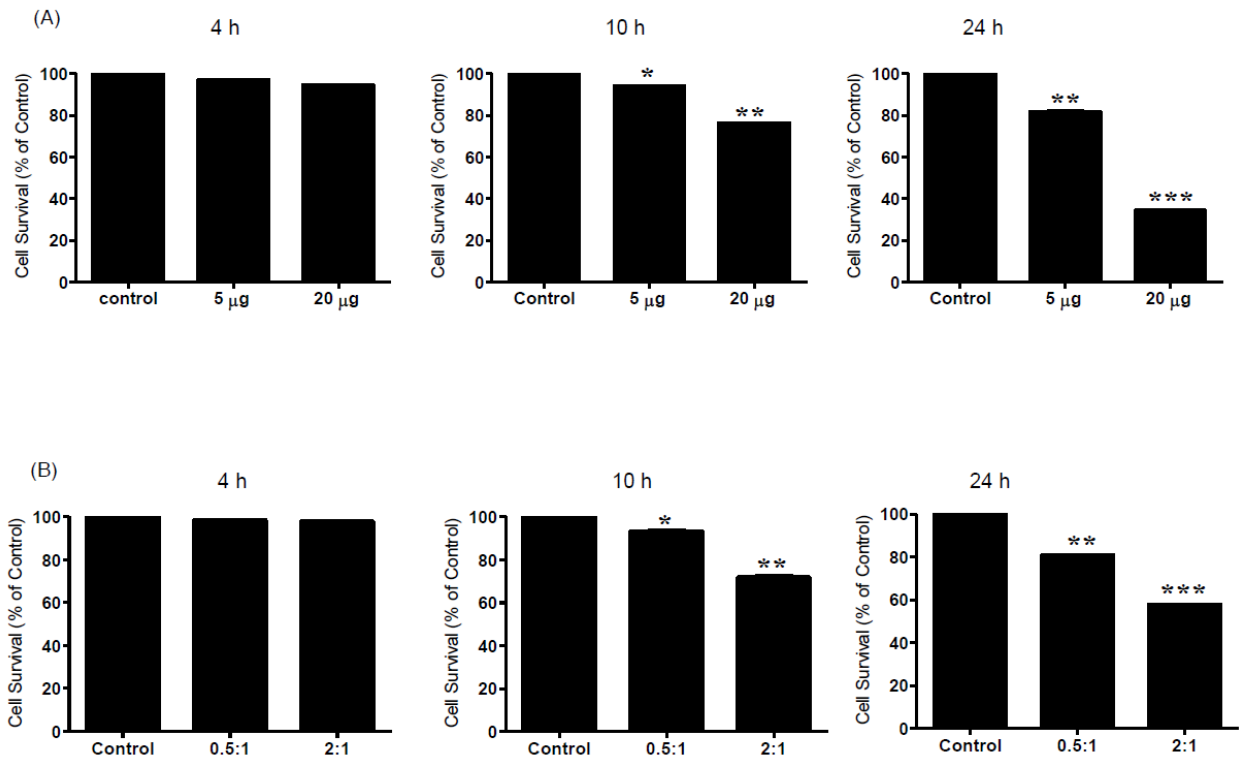

**Supplementary Fig 3. Measurement of NK-92 Exo and NK cell anti-tumor effects by CCK-8 assay.**

The cytotoxicities of NK-92 Exo (A) and NK cells (B) against B16F10/effluc cells were evaluated by CCK-8 assay and both increased in a dose- and time-dependent manner. Experiments were performed at least in triplicate and mean  $\pm$  SD were plotted. \* $p < 0.05$ , \*\* $p < 0.01$ , \*\*\* $p < 0.001$ .

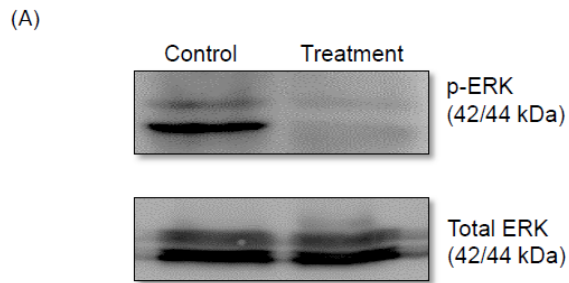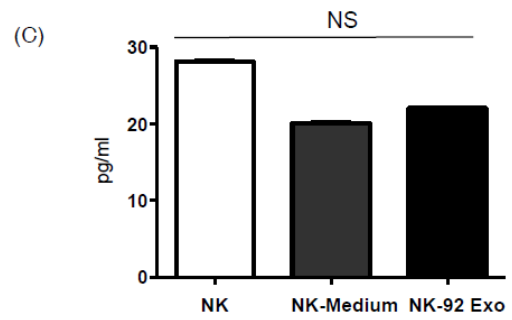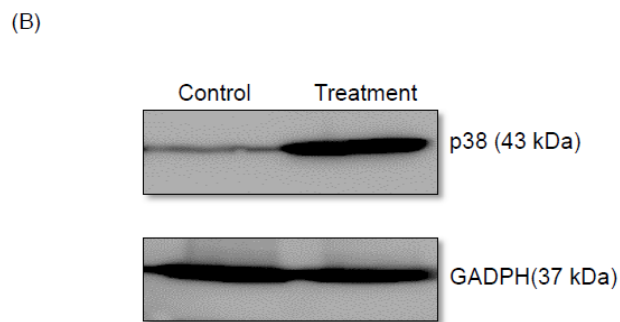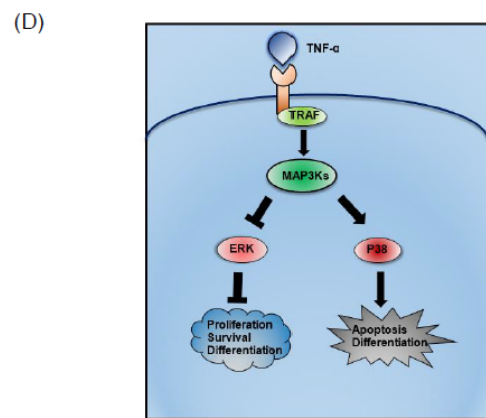

**Supplementary Fig 4. Effect of NK-92 Exo on p-ERK and p38.**

(A) and (B) NK-92 Exo treatment decreased p-ERK levels by 0.53-fold and increased p38 protein levels by 4.71-fold compared with the control group. (C) Enzyme-linked immunosorbent assay for TNF- $\alpha$  with NK cells, medium, and NK-92 Exo. (D) Diagram depicting the anti-proliferative effect of TNF- $\alpha$ .

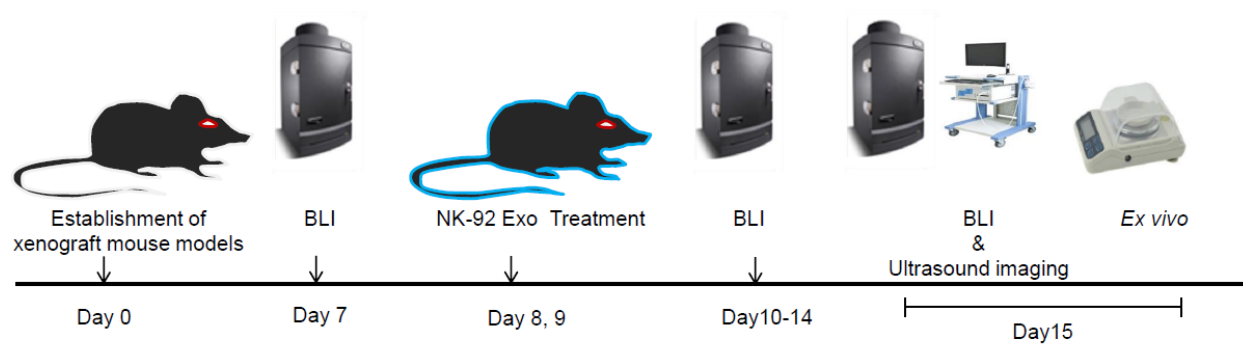

**Supplementary Fig 5. Scheme of *in vivo* experiments.**

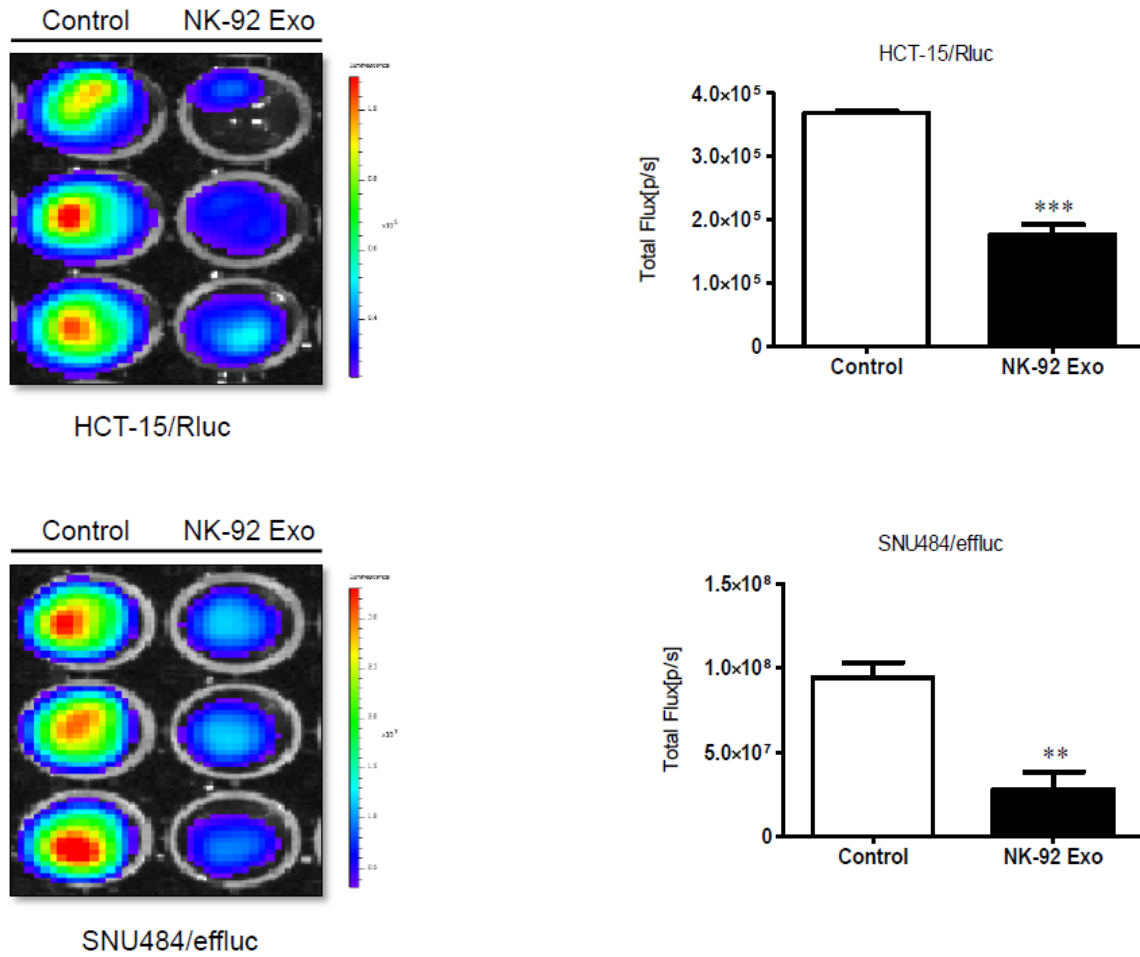

**Supplementary Fig 6. Cytotoxicity of NK-92 Exo against colon cancer cells and gastric carcinoma cells.**

Bioluminescence signals were obtained for HCT-15/Rluc and SNU484/effluc cells after 24 h co-culture with 20  $\mu$ g NK-92 Exo. The signal was evidently decreased by the co-culture. Experiments were performed at least in triplicate and mean  $\pm$  SD were plotted.  $**p < 0.01$ ,  $***p < 0.001$ .
